# Supplementary material
Source: Springer Nature journal article supplement (https://www.springermedizin.de/resource/supplementary/13058_2013_3420_MOESM1_ESM.pdf/9704130)
Supplement: MOESM1 [file 9704130]

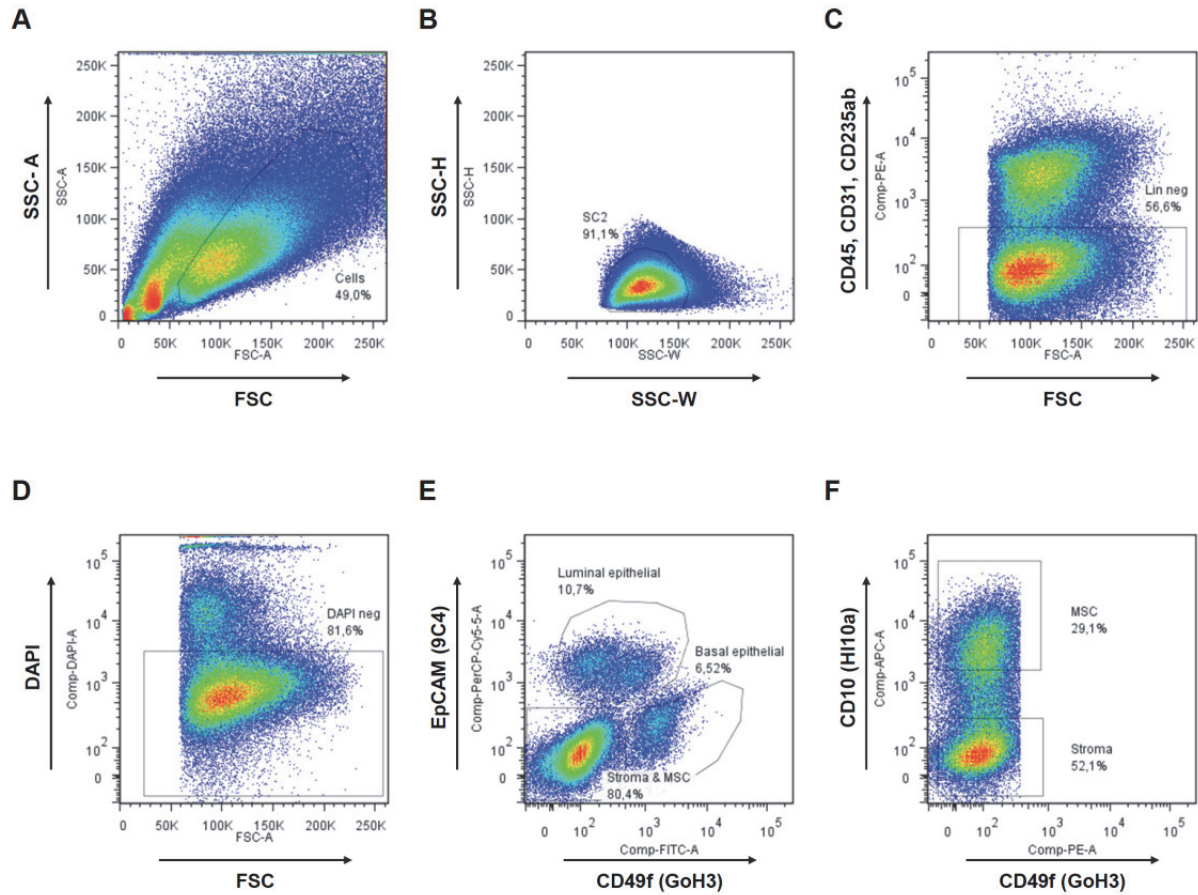

**Additional file 1: Flow cytometry sorting strategy for the isolation of different epithelial and mesenchymal cell populations from freshly dissociated breast tissue organoids.** (A) Gate to exclude cell debris is shown. (B) Gate to exclude duplets. (C) Gate to exclude lineage positive Cells. (D) Gate to exclude dead cells. (E) Gates to sort EpCAM<sup>+</sup> and CD49<sup>+</sup> EpCAM<sup>-</sup> epithelial cells plus gate to separate mesenchymal cells. (F) Gates to sort CD10<sup>+</sup> and CD10<sup>-</sup> mesenchymal cells.
